# Supplementary material for: Ailanthone Inhibits Proliferation, Migration and Invasion of Osteosarcoma Cells by Downregulating the Serine Biosynthetic Pathway
Source: Front Oncol. 2022 Feb 3;12:842406. doi: 10.3389/fonc.2022.842406 (PMC8850634; doi:10.3389/fonc.2022.842406)
Supplement: Supplementary file 1 [file Table_1.xlsx]

## Sheet: 899 DEPs in OS cells after AIL 
	899 DEPs in OS cells after AIL Treatment
Accession	Protein Name	Gene Name	AIL/CON	t test p value
P32926	Desmoglein-3	DSG3	4.84094	0.0111936
P02765	Alpha-2-HS-glycoprotein	AHSG	3.2843	4.56813e-05
Q9UM22	Mammalian ependymin-related protein 1	EPDR1	3.20727	0.00195109
Q14164	Inhibitor of nuclear factor kappa-B kinase subunit epsilon	IKBKE	2.99486	0.0082105
O95749	Geranylgeranyl pyrophosphate synthase	GGPS1	2.933	0.035223
P02768	Albumin	ALB	2.78746	0.00249837
Q8NHQ9	ATP-dependent RNA helicase DDX55	DDX55	2.76767	0.00442225
P01579	Interferon gamma	IFNG	2.76755	2.55141e-05
P02787	Serotransferrin	TF	2.56393	0.00404367
P02748	Complement component C9	C9	2.51102	0.00813443
O00308	NEDD4-like E3 ubiquitin-protein ligase WWP2	WWP2	2.46861	5.37863e-05
P02771	Alpha-fetoprotein	AFP	2.43635	0.00405367
P02788	Lactotransferrin	LTF	2.43069	0.00540627
P05543	Thyroxine-binding globulin	SERPINA7	2.41293	0.014564
Q16854	Deoxyguanosine kinase, mitochondrial	DGUOK	2.32504	0.00165896
P10643	Complement component C7	C7	2.31682	0.00268283
Q9NRN9	rRNA N6-adenosine-methyltransferase METTL5	METTL5	2.27689	0.037957
Q9Y5X9	Endothelial lipase	LIPG	2.26884	0.0280196
Q9NQX4	Unconventional myosin-Vc	MYO5C	2.26433	0.00363667
P62699	Protein yippee-like 5	YPEL5	2.17715	0.00418852
Q12926	ELAV-like protein 2	ELAVL2	2.1662	0.000240831
P02760	Protein AMBP	AMBP	2.14536	0.0112578
P01008	Antithrombin-III	SERPINC1	2.14367	0.00528213
Q96QB1	Rho GTPase-activating protein 7	DLC1	2.1305	0.0301507
Q7L1W4	Volume-regulated anion channel subunit LRRC8D	LRRC8D	2.12698	0.0157742
P01024	Complement C3	C3	2.12106	0.00310124
P35527	Keratin, type I cytoskeletal 9	KRT9	2.10147	0.00209355
P36955	Pigment epithelium-derived factor	SERPINF1	2.08118	0.00178243
Q13227	G protein pathway suppressor 2	GPS2	2.05385	0.0358238
Q8NI35	InaD-like protein	PATJ	2.01685	0.000772639
P49747	Cartilage oligomeric matrix protein	COMP	1.98301	0.00964812
Q8NAT1	Protein O-linked-mannose beta-1,4-N-acetylglucosaminyltransferase 2	POMGNT2	1.90413	0.0403167
P02749	Beta-2-glycoprotein 1	APOH	1.90227	0.000148813
Q14624	Inter-alpha-trypsin inhibitor heavy chain H4	ITIH4	1.90097	0.00637209
O14879	Interferon-induced protein with tetratricopeptide repeats 3	IFIT3	1.89113	0.00027656
P02790	Hemopexin	HPX	1.88403	0.00871714
P19823	Inter-alpha-trypsin inhibitor heavy chain H2	ITIH2	1.87363	0.00539563
Q9H920	RING finger protein 121	RNF121	1.82936	0.0183101
P02766	Transthyretin	TTR	1.81795	0.000764452
P54277	PMS1 protein homolog 1	PMS1	1.80572	0.0125566
P30291	Wee1-like protein kinase	WEE1	1.79903	0.0014996
P04264	Keratin, type II cytoskeletal 1	KRT1	1.78299	0.00420933
P02774	Vitamin D-binding protein	GC	1.78058	0.000191993
Q494V2	Cilia- and flagella-associated protein 100	CFAP100	1.74911	0.00630466
Q8TF46	DIS3-like exonuclease 1	DIS3L	1.7429	0.00181173
O95822	Malonyl-CoA decarboxylase, mitochondrial	MLYCD	1.73869	0.0494765
P01023	Alpha-2-macroglobulin	A2M	1.73394	0.00342932
Q8N3J6	Cell adhesion molecule 2	CADM2	1.73004	0.00356492
Q92968	Peroxisomal membrane protein PEX13	PEX13	1.69859	0.000114228
P24390	ER lumen protein-retaining receptor 1	KDELR1	1.69012	0.00286194
P00740	Coagulation factor IX	F9	1.68266	0.00288214
Q9H4M7	Pleckstrin homology domain-containing family A member 4	PLEKHA4	1.66535	0.0141053
Q05932	Folylpolyglutamate synthase, mitochondrial	FPGS	1.66142	0.00836553
O75380	NADH dehydrogenase [ubiquinone] iron-sulfur protein 6, mitochondrial	NDUFS6	1.65031	0.0187285
Q99808	Equilibrative nucleoside transporter 1	SLC29A1	1.64198	0.00272868
O60907	F-box-like/WD repeat-containing protein TBL1X	TBL1X	1.64136	0.00354252
Q86UX6	Serine/threonine-protein kinase 32C	STK32C	1.63519	0.0281674
P43358	Melanoma-associated antigen 4	MAGEA4	1.63417	0.0110446
P02794	Ferritin heavy chain	FTH1	1.62045	0.000379194
P03952	Plasma kallikrein	KLKB1	1.5989	0.00828184
Q9H813	Proton-activated chloride channel	PACC1	1.59786	0.000470482
Q07912	Activated CDC42 kinase 1	TNK2	1.59483	0.0176026
Q8TB92	3-hydroxy-3-methylglutaryl-CoA lyase, cytoplasmic	HMGCLL1	1.59186	0.0106229
P02458	Collagen alpha-1(II) chain	COL2A1	1.58488	0.00438929
Q12772	Sterol regulatory element-binding protein 2	SREBF2	1.57755	0.0144576
Q9NV88	Integrator complex subunit 9	INTS9	1.55636	0.0068523
Q5BJF2	Sigma intracellular receptor 2	TMEM97	1.5102	0.01081
O95497	Pantetheinase	VNN1	1.50758	0.00183438
P05452	Tetranectin	CLEC3B	1.50263	0.00604136
P02792	Ferritin light chain	FTL	1.50071	0.0175372
Q9UBM7	7-dehydrocholesterol reductase	DHCR7	1.47435	0.00857248
P62068	Ubiquitin carboxyl-terminal hydrolase 46	USP46	1.47363	0.00178394
Q9HA47	Uridine-cytidine kinase 1	UCK1	1.47308	0.00481898
Q96GS6	Alpha/beta hydrolase domain-containing protein 17A	ABHD17A	1.47154	0.0406087
Q8NBM4	Ubiquitin-associated domain-containing protein 2	UBAC2	1.46305	0.0139024
Q8TCU4	Alstrom syndrome protein 1	ALMS1	1.45156	0.00290788
Q8NC60	Nitric oxide-associated protein 1	NOA1	1.45104	0.00909199
Q9NR30	Nucleolar RNA helicase 2	DDX21	1.45076	0.001875
Q6AWC2	Protein WWC2	WWC2	1.45062	0.00462364
Q03393	6-pyruvoyl tetrahydrobiopterin synthase	PTS	1.44925	0.00725225
Q8WY22	BRI3-binding protein	BRI3BP	1.44807	0.0210743
Q16533	snRNA-activating protein complex subunit 1	SNAPC1	1.44378	0.00149001
Q96G23	Ceramide synthase 2	CERS2	1.44184	0.0164896
Q9NUL7	Probable ATP-dependent RNA helicase DDX28	DDX28	1.43816	0.0290081
Q86YZ3	Hornerin	HRNR	1.43463	0.0074812
P00450	Ceruloplasmin	CP	1.43447	0.0347705
O14529	Homeobox protein cut-like 2	CUX2	1.43431	0.00938186
Q15392	Delta(24)-sterol reductase	DHCR24	1.42963	0.00248117
P04114	Apolipoprotein B-100	APOB	1.42769	0.00870016
P00734	Prothrombin	F2	1.42636	0.00547377
P40616	ADP-ribosylation factor-like protein 1	ARL1	1.4232	0.0313673
O60890	Oligophrenin-1	OPHN1	1.41768	0.0491326
Q6XZF7	Dynamin-binding protein	DNMBP	1.41749	0.000803942
O00148	ATP-dependent RNA helicase DDX39A	DDX39A	1.41532	0.00117442
P50336	Protoporphyrinogen oxidase	PPOX	1.41117	0.0444653
A2RUC4	tRNA wybutosine-synthesizing protein 5	TYW5	1.40821	0.0158946
Q6IPR3	tRNA wybutosine-synthesizing protein 3 homolog	TYW3	1.40782	0.0302604
P12259	Coagulation factor V	F5	1.40199	0.0047928
P60842	Eukaryotic initiation factor 4A-I	EIF4A1	1.39905	0.00962782
Q8IWG1	Dynein intermediate chain 3, axonemal	DNAI3	1.39209	0.0232918
P15311	Ezrin	EZR	1.38738	0.0063405
Q92802	NEDD4-binding protein 2-like 2	N4BP2L2	1.38372	0.0168133
Q8TBZ6	tRNA methyltransferase 10 homolog A	TRMT10A	1.38286	0.00838635
Q9P2Q2	FERM domain-containing protein 4A	FRMD4A	1.37954	3.03036e-05
Q96RT8	Gamma-tubulin complex component 5	TUBGCP5	1.37432	0.0220303
O15116	U6 snRNA-associated Sm-like protein LSm1	LSM1	1.37382	0.0236276
P09914	Interferon-induced protein with tetratricopeptide repeats 1	IFIT1	1.37355	0.0156466
Q9H9L3	Interferon-stimulated 20 kDa exonuclease-like 2	ISG20L2	1.36821	0.00350311
Q5T7M9	Divergent protein kinase domain 1A	DIPK1A	1.36683	0.00154282
P21810	Biglycan	BGN	1.3666	0.0156948
Q8WZA1	Protein O-linked-mannose beta-1,2-N-acetylglucosaminyltransferase 1	POMGNT1	1.36659	0.0111643
Q14728	Major facilitator superfamily domain-containing protein 10	MFSD10	1.36184	0.0109622
O15040	Tectonin beta-propeller repeat-containing protein 2	TECPR2	1.36132	0.00526048
Q9BY08	Emopamil-binding protein-like	EBPL	1.36112	0.00986964
P14210	Hepatocyte growth factor	HGF	1.35952	0.00509176
O14735	CDP-diacylglycerol--inositol 3-phosphatidyltransferase	CDIPT	1.35777	0.00906194
Q8NBQ5	Estradiol 17-beta-dehydrogenase 11	HSD17B11	1.35758	0.0354726
P15559	NAD(P)H dehydrogenase [quinone] 1	NQO1	1.3525	0.00236206
Q8WVB6	Chromosome transmission fidelity protein 18 homolog	CHTF18	1.35245	0.00987733
Q9UK39	Nocturnin	NOCT	1.34977	0.00464281
Q7Z4G4	tRNA (guanine(10)-N2)-methyltransferase homolog	TRMT11	1.34853	0.0174702
Q92536	Y+L amino acid transporter 2	SLC7A6	1.34817	0.0364537
O75317	Ubiquitin carboxyl-terminal hydrolase 12	USP12	1.34689	0.0179769
Q9UHD1	Cysteine and histidine-rich domain-containing protein 1	CHORDC1	1.34677	0.00440171
P13807	Glycogen [starch] synthase, muscle	GYS1	1.34478	0.00898299
Q9UG63	ATP-binding cassette sub-family F member 2	ABCF2	1.34313	0.00667575
Q02742	Beta-1,3-galactosyl-O-glycosyl-glycoprotein beta-1,6-N-acetylglucosaminyltransferase	GCNT1	1.34196	0.00688007
Q9Y4B5	Microtubule cross-linking factor 1	MTCL1	1.3406	0.00646493
Q96EV2	RNA-binding protein 33	RBM33	1.34056	0.022541
O95445	Apolipoprotein M	APOM	1.34	0.0124454
Q96AC1	Fermitin family homolog 2	FERMT2	1.33848	0.00319075
P51617	Interleukin-1 receptor-associated kinase 1	IRAK1	1.33836	0.00679317
Q9C0K1	Metal cation symporter ZIP8	SLC39A8	1.33696	0.00113583
Q15363	Transmembrane emp24 domain-containing protein 2	TMED2	1.33298	0.045877
P12955	Xaa-Pro dipeptidase	PEPD	1.32858	0.00336045
P46734	Dual specificity mitogen-activated protein kinase kinase 3	MAP2K3	1.32822	0.00444374
Q9Y6C9	Mitochondrial carrier homolog 2	MTCH2	1.32774	0.016199
Q01968	Inositol polyphosphate 5-phosphatase OCRL	OCRL	1.32586	0.0155247
Q9NRM2	Zinc finger protein 277	ZNF277	1.32554	0.00341238
O15258	Protein RER1	RER1	1.32202	0.00685121
P23368	NAD-dependent malic enzyme, mitochondrial	ME2	1.32177	0.00714665
Q9UBH6	Xenotropic and polytropic retrovirus receptor 1	XPR1	1.3208	0.00791431
P55039	Developmentally-regulated GTP-binding protein 2	DRG2	1.32077	0.0359048
P07099	Epoxide hydrolase 1	EPHX1	1.31976	0.0316226
Q9BXJ8	Ion channel TACAN	TMEM120A	1.31729	0.014022
O43854	EGF-like repeat and discoidin I-like domain-containing protein 3	EDIL3	1.31687	0.00402646
Q9H237	Protein-serine O-palmitoleoyltransferase porcupine	PORCN	1.31681	0.0328744
Q14240	Eukaryotic initiation factor 4A-II	EIF4A2	1.31424	0.0245255
Q12800	Alpha-globin transcription factor CP2	TFCP2	1.31409	0.0453275
Q9BPX7	UPF0415 protein C7orf25	C7orf25	1.31261	0.00776657
Q9H5X1	Cytosolic iron-sulfur assembly component 2A	CIAO2A	1.31112	0.0145364
P15121	Aldo-keto reductase family 1 member B1	AKR1B1	1.31079	0.0446295
O14744	Protein arginine N-methyltransferase 5	PRMT5	1.31002	0.00547956
Q9Y2H1	Serine/threonine-protein kinase 38-like	STK38L	1.30942	0.0421815
P60981	Destrin	DSTN	1.3082	0.00110694
P53794	Sodium/myo-inositol cotransporter	SLC5A3	1.30744	0.0110765
O60506	Heterogeneous nuclear ribonucleoprotein Q	SYNCRIP	1.30454	0.0148906
P27105	Stomatin	STOM	1.30252	0.0251959
O43242	26S proteasome non-ATPase regulatory subunit 3	PSMD3	1.30099	0.0294177
Q9BZ67	FERM domain-containing protein 8	FRMD8	1.3008	0.0412548
P41743	Protein kinase C iota type	PRKCI	1.29923	0.0187379
P46777	60S ribosomal protein L5	RPL5	1.29795	0.0475182
Q15438	Cytohesin-1	CYTH1	1.29755	0.00441246
Q8N999	Uncharacterized protein C12orf29	C12orf29	1.29636	0.0118749
Q9H892	Tetratricopeptide repeat protein 12	TTC12	1.2961	0.00337338
Q9BYC8	39S ribosomal protein L32, mitochondrial	MRPL32	1.29597	0.00618961
O75436	Vacuolar protein sorting-associated protein 26A	VPS26A	1.29575	0.0280557
P11413	Glucose-6-phosphate 1-dehydrogenase	G6PD	1.29564	0.00129706
P61221	ATP-binding cassette sub-family E member 1	ABCE1	1.29518	0.0152228
P12236	ADP/ATP translocase 3	SLC25A6	1.29461	0.0229591
O75907	Diacylglycerol O-acyltransferase 1	DGAT1	1.29431	0.0497125
O14678	Lysosomal cobalamin transporter ABCD4	ABCD4	1.29411	0.00254085
Q9BPZ7	Target of rapamycin complex 2 subunit MAPKAP1	MAPKAP1	1.2941	0.011443
P60509	Endogenous retrovirus group PABLB member 1 Env polyprotein	ERVPABLB-1	1.29331	0.0194616
P08048	Zinc finger Y-chromosomal protein	ZFY	1.29285	0.00167472
Q92979	Ribosomal RNA small subunit methyltransferase NEP1	EMG1	1.29172	0.0434603
Q9Y5B6	PAX3- and PAX7-binding protein 1	PAXBP1	1.29036	0.00537562
Q9Y2X0	Mediator of RNA polymerase II transcription subunit 16	MED16	1.28891	0.026434
Q3B726	DNA-directed RNA polymerase I subunit RPA43	POLR1F	1.28891	0.0194096
Q9Y2X3	Nucleolar protein 58	NOP58	1.28886	0.0265947
Q8N8S7	Protein enabled homolog	ENAH	1.28738	0.00971867
A0AV96	RNA-binding protein 47	RBM47	1.28592	0.00985679
Q7Z7H8	39S ribosomal protein L10, mitochondrial	MRPL10	1.28552	0.00457946
Q8N9M1	Uncharacterized protein C19orf47	C19orf47	1.28527	0.0339372
Q9ULG6	Cell cycle progression protein 1	CCPG1	1.28516	0.018015
P11387	DNA topoisomerase 1	TOP1	1.28341	0.0436235
Q96CW1	AP-2 complex subunit mu	AP2M1	1.28232	0.0451296
Q13557	Calcium/calmodulin-dependent protein kinase type II subunit delta	CAMK2D	1.28141	0.0251273
Q6NXT4	Zinc transporter 6	SLC30A6	1.28092	0.0285114
P23297	Protein S100-A1	S100A1	1.28028	0.0407371
Q5VV41	Rho guanine nucleotide exchange factor 16	ARHGEF16	1.27916	0.000871167
Q9Y3D8	Adenylate kinase isoenzyme 6	AK6	1.27827	0.0385134
Q9UKD2	mRNA turnover protein 4 homolog	MRTO4	1.27774	0.00316766
Q13555	Calcium/calmodulin-dependent protein kinase type II subunit gamma	CAMK2G	1.27578	0.023093
Q06265	Exosome complex component RRP45	EXOSC9	1.27539	0.0463079
Q9H0K1	Serine/threonine-protein kinase SIK2	SIK2	1.2744	0.0208774
Q9NXK8	F-box/LRR-repeat protein 12	FBXL12	1.27331	0.0422172
Q9P2D1	Chromodomain-helicase-DNA-binding protein 7	CHD7	1.27199	0.0322315
Q6NYC1	Bifunctional arginine demethylase and lysyl-hydroxylase JMJD6	JMJD6	1.27105	0.00903772
Q9BTV4	Transmembrane protein 43	TMEM43	1.27102	0.04791
P50579	Methionine aminopeptidase 2	METAP2	1.27095	0.00527301
Q8N543	Prolyl 3-hydroxylase OGFOD1	OGFOD1	1.27052	0.0052182
O43572	A-kinase anchor protein 10, mitochondrial	AKAP10	1.26983	0.0116373
Q494U1	Pleckstrin homology domain-containing family N member 1	PLEKHN1	1.26905	0.0148033
Q02790	Peptidyl-prolyl cis-trans isomerase FKBP4	FKBP4	1.26782	0.000701158
O75382	Tripartite motif-containing protein 3	TRIM3	1.26701	0.0012442
Q9Y2T2	AP-3 complex subunit mu-1	AP3M1	1.26606	0.0116282
Q14449	Growth factor receptor-bound protein 14	GRB14	1.26539	0.0127906
Q8NF37	Lysophosphatidylcholine acyltransferase 1	LPCAT1	1.26437	0.029215
P10075	Zinc finger protein GLI4	GLI4	1.26388	0.0116173
Q5JTH9	RRP12-like protein	RRP12	1.26383	0.0488446
O00159	Unconventional myosin-Ic	MYO1C	1.2635	0.0168418
P48739	Phosphatidylinositol transfer protein beta isoform	PITPNB	1.26218	0.00351836
O75884	Serine hydrolase RBBP9	RBBP9	1.26175	0.0441927
P26038	Moesin	MSN	1.26142	0.00689339
Q9NVP1	ATP-dependent RNA helicase DDX18	DDX18	1.26115	0.0175938
P46087	Probable 28S rRNA (cytosine(4447)-C(5))-methyltransferase	NOP2	1.26109	0.0015912
P26639	Threonine--tRNA ligase 1, cytoplasmic	TARS1	1.26097	0.00765889
Q12986	Transcriptional repressor NF-X1	NFX1	1.26025	0.00652931
P56937	3-keto-steroid reductase/17-beta-hydroxysteroid dehydrogenase 7	HSD17B7	1.26012	0.0204161
Q96KA5	Cleft lip and palate transmembrane protein 1-like protein	CLPTM1L	1.25967	0.0398968
Q0ZGT2	Nexilin	NEXN	1.25935	0.00044541
P23142	Fibulin-1	FBLN1	1.25889	0.0301106
Q9Y6E2	Basic leucine zipper and W2 domain-containing protein 2	BZW2	1.25798	0.0113851
Q86WX3	Active regulator of SIRT1	RPS19BP1	1.25708	0.00900403
Q9P0V9	Septin-10	SEPTIN10	1.25648	0.00815597
Q96BP3	Peptidylprolyl isomerase domain and WD repeat-containing protein 1	PPWD1	1.25524	0.0200326
P49755	Transmembrane emp24 domain-containing protein 10	TMED10	1.25504	0.0429499
O14495	Phospholipid phosphatase 3	PLPP3	1.25473	0.0123204
O96007	Molybdopterin synthase catalytic subunit	MOCS2	1.25459	0.00778496
P30419	Glycylpeptide N-tetradecanoyltransferase 1	NMT1	1.25438	0.0011623
Q9HCE3	Zinc finger protein 532	ZNF532	1.25421	0.00196603
Q9NZJ7	Mitochondrial carrier homolog 1	MTCH1	1.25416	0.0324679
Q9Y2I1	Nischarin	NISCH	1.25256	0.00589052
Q9P2P5	E3 ubiquitin-protein ligase HECW2	HECW2	1.25191	0.0165445
P48059	LIM and senescent cell antigen-like-containing domain protein 1	LIMS1	1.25124	0.0376667
Q9UBB5	Methyl-CpG-binding domain protein 2	MBD2	1.25123	0.0412188
A8MXV4	Nucleoside diphosphate-linked moiety X motif 19	NUDT19	1.25113	0.0274803
P10620	Microsomal glutathione S-transferase 1	MGST1	1.25105	0.0432411
P17252	Protein kinase C alpha type	PRKCA	1.24829	0.0258778
P61158	Actin-related protein 3	ACTR3	1.24767	0.00198357
Q9UBK8	Methionine synthase reductase	MTRR	1.24759	0.00319991
Q01581	Hydroxymethylglutaryl-CoA synthase, cytoplasmic	HMGCS1	1.24455	0.00142336
Q9NWR8	Calcium uniporter regulatory subunit MCUb, mitochondrial	MCUB	1.24404	0.045155
Q8NDD1	Uncharacterized protein C1orf131	C1orf131	1.24403	0.00868277
Q96T76	MMS19 nucleotide excision repair protein homolog	MMS19	1.24374	0.00474839
P19827	Inter-alpha-trypsin inhibitor heavy chain H1	ITIH1	1.24371	0.0194919
Q99986	Serine/threonine-protein kinase VRK1	VRK1	1.2426	0.00807538
Q8IV08	5'-3' exonuclease PLD3	PLD3	1.24189	0.017007
O00567	Nucleolar protein 56	NOP56	1.24017	0.00603596
P32929	Cystathionine gamma-lyase	CTH	1.23875	0.00310472
Q9UGI8	Testin	TES	1.23784	0.00989639
Q8N4L2	Type 2 phosphatidylinositol 4,5-bisphosphate 4-phosphatase	PIP4P2	1.23726	0.00303338
P05141	ADP/ATP translocase 2	SLC25A5	1.23716	0.0380139
Q86XA9	HEAT repeat-containing protein 5A	HEATR5A	1.23645	0.00248725
Q6NZI2	Caveolae-associated protein 1	CAVIN1	1.2359	0.027029
Q12893	Transmembrane protein 115	TMEM115	1.2355	0.0119971
Q8WXF1	Paraspeckle component 1	PSPC1	1.2345	0.00056624
Q8N5W9	Refilin-B	RFLNB	1.23434	0.0109584
Q15233	Non-POU domain-containing octamer-binding protein	NONO	1.23379	0.0120567
O95801	Tetratricopeptide repeat protein 4	TTC4	1.23333	0.00682153
Q12965	Unconventional myosin-Ie	MYO1E	1.23329	0.017749
Q8NEZ4	Histone-lysine N-methyltransferase 2C	KMT2C	1.23123	0.0227421
O43143	Pre-mRNA-splicing factor ATP-dependent RNA helicase DHX15	DHX15	1.23029	0.0435728
Q16563	Synaptophysin-like protein 1	SYPL1	1.2297	0.0153905
P46736	Lys-63-specific deubiquitinase BRCC36	BRCC3	1.22946	0.0142798
Q8WTT2	Nucleolar complex protein 3 homolog	NOC3L	1.22817	0.00264504
P32455	Guanylate-binding protein 1	GBP1	1.228	0.0107968
Q9BZF1	Oxysterol-binding protein-related protein 8	OSBPL8	1.22748	0.0261051
Q5BKZ1	DBIRD complex subunit ZNF326	ZNF326	1.2272	0.00726889
Q969S3	Zinc finger protein 622	ZNF622	1.22679	0.000879312
P04049	RAF proto-oncogene serine/threonine-protein kinase	RAF1	1.2248	0.0133424
O75127	Pentatricopeptide repeat-containing protein 1, mitochondrial	PTCD1	1.22458	0.0200061
Q7Z443	Polycystic kidney disease protein 1-like 3	PKD1L3	1.22446	0.0148971
Q15006	ER membrane protein complex subunit 2	EMC2	1.22436	0.00979622
Q14678	KN motif and ankyrin repeat domain-containing protein 1	KANK1	1.22336	0.0248564
O14772	Fucose-1-phosphate guanylyltransferase	FPGT	1.22284	0.0190424
O43776	Asparagine--tRNA ligase, cytoplasmic	NARS1	1.2227	0.00128145
Q16566	Calcium/calmodulin-dependent protein kinase type IV	CAMK4	1.22263	0.0297812
O94923	D-glucuronyl C5-epimerase	GLCE	1.22258	0.0157827
Q9BUB4	tRNA-specific adenosine deaminase 1	ADAT1	1.22242	0.00551492
P48449	Lanosterol synthase	LSS	1.22161	0.0052218
Q9BXN6	Sperm protein associated with the nucleus on the X chromosome D	SPANXD	1.22122	0.0211416
P11216	Glycogen phosphorylase, brain form	PYGB	1.22043	0.00697316
Q9BTU6	Phosphatidylinositol 4-kinase type 2-alpha	PI4K2A	1.22003	0.0143426
O43924	Retinal rod rhodopsin-sensitive cGMP 3',5'-cyclic phosphodiesterase subunit delta	PDE6D	1.2194	0.0494944
Q9Y5X2	Sorting nexin-8	SNX8	1.21922	0.00976167
Q5SWX8	Protein odr-4 homolog	ODR4	1.21866	0.0493664
P28070	Proteasome subunit beta type-4	PSMB4	1.21849	0.0114701
P53396	ATP-citrate synthase	ACLY	1.21779	0.00687925
Q13131	5'-AMP-activated protein kinase catalytic subunit alpha-1	PRKAA1	1.21736	0.0226611
Q9Y2L1	Exosome complex exonuclease RRP44	DIS3	1.21652	0.00626428
O75923	Dysferlin	DYSF	1.21544	0.0462367
Q9GZU1	Mucolipin-1	MCOLN1	1.21538	0.0215483
Q9Y3C4	EKC/KEOPS complex subunit TPRKB	TPRKB	1.21534	0.0350721
P49917	DNA ligase 4	LIG4	1.21514	0.0317797
Q96SU4	Oxysterol-binding protein-related protein 9	OSBPL9	1.21472	0.00145032
P53355	Death-associated protein kinase 1	DAPK1	1.21458	0.00728241
Q99460	26S proteasome non-ATPase regulatory subunit 1	PSMD1	1.21455	0.00698966
Q14149	MORC family CW-type zinc finger protein 3	MORC3	1.21421	0.0137294
O94851	[F-actin]-monooxygenase MICAL2	MICAL2	1.2142	0.00449738
Q9NRN7	L-aminoadipate-semialdehyde dehydrogenase-phosphopantetheinyl transferase	AASDHPPT	1.21395	0.042962
Q5R372	Rab GTPase-activating protein 1-like	RABGAP1L	1.21293	0.00100959
O96008	Mitochondrial import receptor subunit TOM40 homolog	TOMM40	1.21241	0.0226502
Q6UWP7	Lysocardiolipin acyltransferase 1	LCLAT1	1.21193	0.0385952
Q9Y570	Protein phosphatase methylesterase 1	PPME1	1.21192	0.0195112
Q86XP1	Diacylglycerol kinase eta	DGKH	1.21189	0.00787216
Q9UGJ0	5'-AMP-activated protein kinase subunit gamma-2	PRKAG2	1.21155	0.043094
P63000	Ras-related C3 botulinum toxin substrate 1	RAC1	1.21093	0.00628969
A0FGR8	Extended synaptotagmin-2	ESYT2	1.21037	0.0228254
Q562R1	Beta-actin-like protein 2	ACTBL2	1.21009	0.0278759
Q6GQQ9	OTU domain-containing protein 7B	OTUD7B	1.20997	0.00529901
P62495	Eukaryotic peptide chain release factor subunit 1	ETF1	1.20989	0.0231111
Q8WYA6	Beta-catenin-like protein 1	CTNNBL1	1.20892	0.00421217
Q9Y3Z3	Deoxynucleoside triphosphate triphosphohydrolase SAMHD1	SAMHD1	1.20887	0.000838801
P62314	Small nuclear ribonucleoprotein Sm D1	SNRPD1	1.20843	0.0411228
O43896	Kinesin-like protein KIF1C	KIF1C	1.2082	0.0167219
Q96DE0	U8 snoRNA-decapping enzyme	NUDT16	1.20801	0.00336815
Q9NT68	Teneurin-2	TENM2	1.20801	0.0157468
Q96BX8	MOB kinase activator 3A	MOB3A	1.20755	0.00256522
Q3KQV9	UDP-N-acetylhexosamine pyrophosphorylase-like protein 1	UAP1L1	1.20693	0.00765308
Q9UIC8	Leucine carboxyl methyltransferase 1	LCMT1	1.20664	0.0227481
P35241	Radixin	RDX	1.20634	0.00786493
P11940	Polyadenylate-binding protein 1	PABPC1	1.2062	0.00180319
Q9NZM1	Myoferlin	MYOF	1.20585	0.0256252
Q00577	Transcriptional activator protein Pur-alpha	PURA	1.20562	0.0185253
Q9H5I1	Histone-lysine N-methyltransferase SUV39H2	SUV39H2	1.20517	0.00492348
Q92643	GPI-anchor transamidase	PIGK	1.20493	0.0095982
P29401	Transketolase	TKT	1.20492	0.0297478
O76074	cGMP-specific 3',5'-cyclic phosphodiesterase	PDE5A	1.2045	0.0137253
P17812	CTP synthase 1	CTPS1	1.2041	0.0061321
Q9NZN3	EH domain-containing protein 3	EHD3	1.20328	0.00977375
O94905	Erlin-2	ERLIN2	1.20266	0.00485515
Q15738	Sterol-4-alpha-carboxylate 3-dehydrogenase, decarboxylating	NSDHL	1.20214	0.00242413
Q9UDR5	Alpha-aminoadipic semialdehyde synthase, mitochondrial	AASS	1.20192	0.00673683
O43772	Mitochondrial carnitine/acylcarnitine carrier protein	SLC25A20	1.20187	0.0170042
Q9Y3A5	Ribosome maturation protein SBDS	SBDS	1.20171	0.0171672
P49756	RNA-binding protein 25	RBM25	1.20149	0.021783
P36383	Gap junction gamma-1 protein	GJC1	1.20104	0.030228
P47897	Glutamine--tRNA ligase	QARS1	1.20086	0.00915367
Q6IBS0	Twinfilin-2	TWF2	1.20018	0.00634805
Q15032	R3H domain-containing protein 1	R3HDM1	1.20002	0.0328624
Q9NRW1	Ras-related protein Rab-6B	RAB6B	0.833187	0.0095339
Q6IBW4	Condensin-2 complex subunit H2	NCAPH2	0.832811	0.0317674
P58546	Myotrophin	MTPN	0.832639	0.0386727
P37198	Nuclear pore glycoprotein p62	NUP62	0.83247	0.0452068
Q5JSZ5	Protein PRRC2B	PRRC2B	0.831766	0.000642641
Q9NYR9	NF-kappa-B inhibitor-interacting Ras-like protein 2	NKIRAS2	0.831634	0.0487743
O75420	GRB10-interacting GYF protein 1	GIGYF1	0.831443	0.0157773
Q9UKK3	Protein mono-ADP-ribosyltransferase PARP4	PARP4	0.83132	0.0493628
Q96RE7	Nucleus accumbens-associated protein 1	NACC1	0.831207	0.038915
Q8NBJ9	SID1 transmembrane family member 2	SIDT2	0.831196	0.000487311
Q16667	Cyclin-dependent kinase inhibitor 3	CDKN3	0.830829	0.00228511
Q71UM5	40S ribosomal protein S27-like	RPS27L	0.830531	0.0316946
Q15796	Mothers against decapentaplegic homolog 2	SMAD2	0.829779	0.0246159
P53634	Dipeptidyl peptidase 1	CTSC	0.829579	0.0302753
P61960	Ubiquitin-fold modifier 1	UFM1	0.829436	0.0248186
P08123	Collagen alpha-2(I) chain	COL1A2	0.829144	0.00397951
Q8WY91	Peroxynitrite isomerase THAP4	THAP4	0.8286	0.0440873
Q9BXW9	Fanconi anemia group D2 protein	FANCD2	0.82839	0.0112407
Q8WUF8	Cotranscriptional regulator FAM172A	FAM172A	0.828293	0.0311204
Q9UH99	SUN domain-containing protein 2	SUN2	0.828269	0.000337985
Q9NP77	RNA polymerase II subunit A C-terminal domain phosphatase SSU72	SSU72	0.827324	0.0142288
Q6PJG2	Mitotic deacetylase-associated SANT domain protein	MIDEAS	0.826775	0.0050576
Q5VV42	Threonylcarbamoyladenosine tRNA methylthiotransferase	CDKAL1	0.826668	0.00959657
Q9H410	Kinetochore-associated protein DSN1 homolog	DSN1	0.826533	0.0436446
Q8WUZ0	B-cell CLL/lymphoma 7 protein family member C	BCL7C	0.826426	0.0108745
O60427	Acyl-CoA (8-3)-desaturase	FADS1	0.826065	0.0476266
Q9BRA2	Thioredoxin domain-containing protein 17	TXNDC17	0.825726	0.0163865
O95490	Adhesion G protein-coupled receptor L2	ADGRL2	0.825709	0.00521346
Q96T88	E3 ubiquitin-protein ligase UHRF1	UHRF1	0.825147	0.000858155
Q969V5	Mitochondrial ubiquitin ligase activator of NFKB 1	MUL1	0.82462	0.0333938
O15488	Glycogenin-2	GYG2	0.824589	0.0155308
P19387	DNA-directed RNA polymerase II subunit RPB3	POLR2C	0.824544	0.000282748
Q8WWY3	U4/U6 small nuclear ribonucleoprotein Prp31	PRPF31	0.823439	0.0163054
P20290	Transcription factor BTF3	BTF3	0.82318	0.0106299
P63220	40S ribosomal protein S21	RPS21	0.823066	0.0152585
Q7Z3B4	Nucleoporin p54	NUP54	0.822895	0.0467779
Q9P2K2	Thioredoxin domain-containing protein 16	TXNDC16	0.822758	0.00516109
Q6Q0C0	E3 ubiquitin-protein ligase TRAF7	TRAF7	0.821806	0.0115187
Q9UGL1	Lysine-specific demethylase 5B	KDM5B	0.821694	0.0431403
Q86V97	Kelch repeat and BTB domain-containing protein 6	KBTBD6	0.821431	0.0097132
P52756	RNA-binding protein 5	RBM5	0.821387	0.0109762
O00408	cGMP-dependent 3',5'-cyclic phosphodiesterase	PDE2A	0.820757	0.0231883
Q15398	Disks large-associated protein 5	DLGAP5	0.820686	0.022689
P25686	DnaJ homolog subfamily B member 2	DNAJB2	0.820104	0.00377812
Q96AH0	SOSS complex subunit B2	NABP1	0.819872	0.00741225
Q86YS6	Ras-related protein Rab-43	RAB43	0.819825	0.000688204
P13984	General transcription factor IIF subunit 2	GTF2F2	0.818978	0.00694691
Q9Y6K8	Adenylate kinase isoenzyme 5	AK5	0.818856	0.0209578
Q96FZ2	Abasic site processing protein HMCES	HMCES	0.818654	0.007763
Q96AY3	Peptidyl-prolyl cis-trans isomerase FKBP10	FKBP10	0.818508	0.0162527
Q13049	E3 ubiquitin-protein ligase TRIM32	TRIM32	0.818037	0.00956962
Q9UBV2	Protein sel-1 homolog 1	SEL1L	0.817507	0.00109224
Q15366	Poly(rC)-binding protein 2	PCBP2	0.816656	0.00380324
Q8WTS6	Histone-lysine N-methyltransferase SETD7	SETD7	0.816426	0.0268754
Q9NZ45	CDGSH iron-sulfur domain-containing protein 1	CISD1	0.816375	0.00348401
Q13683	Integrin alpha-7	ITGA7	0.816364	0.00543336
Q9NX62	Golgi-resident adenosine 3',5'-bisphosphate 3'-phosphatase	BPNT2	0.816221	0.00448744
Q9P2B2	Prostaglandin F2 receptor negative regulator	PTGFRN	0.815897	0.000448331
Q9UKB5	Adherens junction-associated protein 1	AJAP1	0.815549	0.0266598
Q9H902	Receptor expression-enhancing protein 1	REEP1	0.815485	0.0349509
P31483	Nucleolysin TIA-1 isoform p40	TIA1	0.814575	0.0297558
Q8WW12	PEST proteolytic signal-containing nuclear protein	PCNP	0.814474	0.0356388
Q9Y4G8	Rap guanine nucleotide exchange factor 2	RAPGEF2	0.814295	0.00668458
P54756	Ephrin type-A receptor 5	EPHA5	0.813885	0.00451413
Q15056	Eukaryotic translation initiation factor 4H	EIF4H	0.813691	0.0243633
Q9UBG0	C-type mannose receptor 2	MRC2	0.813663	0.0145153
Q99653	Calcineurin B homologous protein 1	CHP1	0.813641	0.00196827
P07858	Cathepsin B	CTSB	0.813284	0.00239274
P37235	Hippocalcin-like protein 1	HPCAL1	0.812642	0.0438182
O60318	Germinal-center associated nuclear protein	MCM3AP	0.812622	0.0265269
Q8IYL3	UPF0688 protein C1orf174	C1orf174	0.812314	0.0286125
Q6NZY4	Zinc finger CCHC domain-containing protein 8	ZCCHC8	0.81214	0.0461238
Q9H4G4	Golgi-associated plant pathogenesis-related protein 1	GLIPR2	0.811947	0.00701123
Q7L9L4	MOB kinase activator 1B	MOB1B	0.811913	0.04955
Q6PJW8	Consortin	CNST	0.811786	0.0307614
P32321	Deoxycytidylate deaminase	DCTD	0.811113	0.00134128
P09001	39S ribosomal protein L3, mitochondrial	MRPL3	0.810762	0.0356612
P07203	Glutathione peroxidase 1	GPX1	0.81045	0.00980863
Q9P016	Thymocyte nuclear protein 1	THYN1	0.810372	0.0174438
O60828	Polyglutamine-binding protein 1	PQBP1	0.810328	0.0186365
Q9Y2Q9	28S ribosomal protein S28, mitochondrial	MRPS28	0.810314	0.0062309
Q96AQ6	Pre-B-cell leukemia transcription factor-interacting protein 1	PBXIP1	0.810273	0.00382214
Q15185	Prostaglandin E synthase 3	PTGES3	0.810113	0.00210525
Q6IQ49	Replication stress response regulator SDE2	SDE2	0.809788	0.029161
Q06413	Myocyte-specific enhancer factor 2C	MEF2C	0.809332	0.0145952
Q9H019	Mitochondrial fission regulator 1-like	MTFR1L	0.809231	0.0390227
Q9H869	YY1-associated protein 1	YY1AP1	0.809181	0.0261175
Q14318	Peptidyl-prolyl cis-trans isomerase FKBP8	FKBP8	0.80916	0.0124922
Q5TBB1	Ribonuclease H2 subunit B	RNASEH2B	0.80905	0.0391513
Q9Y5Z4	Heme-binding protein 2	HEBP2	0.80869	0.0172887
O14773	Tripeptidyl-peptidase 1	TPP1	0.80864	0.0382275
P62979	Ubiquitin-40S ribosomal protein S27a	RPS27A	0.808596	0.0364337
P10109	Adrenodoxin, mitochondrial	FDX1	0.80855	0.00207537
Q92692	Nectin-2	NECTIN2	0.808127	0.0226736
Q7Z3D6	D-glutamate cyclase, mitochondrial	DGLUCY	0.807956	0.00779303
Q8N5M9	Protein jagunal homolog 1	JAGN1	0.807832	0.0468159
Q9BV47	Dual specificity protein phosphatase 26	DUSP26	0.807331	0.0275057
Q9UKT9	Zinc finger protein Aiolos	IKZF3	0.80718	0.0291437
Q9BUH6	Protein PAXX	PAXX	0.807125	0.0201769
P63165	Small ubiquitin-related modifier 1	SUMO1	0.806752	0.0312795
Q9H1E3	Nuclear ubiquitous casein and cyclin-dependent kinase substrate 1	NUCKS1	0.805714	0.0436985
Q56A73	Spindlin-4	SPIN4	0.805643	0.0035638
Q96EI5	Transcription elongation factor A protein-like 4	TCEAL4	0.804837	0.0239688
P80217	Interferon-induced 35 kDa protein	IFI35	0.80449	0.0321374
P07996	Thrombospondin-1	THBS1	0.804087	0.015976
Q96NU1	Sterile alpha motif domain-containing protein 11	SAMD11	0.803324	0.0122279
Q56VL3	OCIA domain-containing protein 2	OCIAD2	0.803216	0.00116326
Q8IXW5	Putative RNA polymerase II subunit B1 CTD phosphatase RPAP2	RPAP2	0.802945	0.00920408
Q9NVT9	Armadillo repeat-containing protein 1	ARMC1	0.802913	0.00585784
P52747	Zinc finger protein 143	ZNF143	0.802272	0.00254094
P19404	NADH dehydrogenase [ubiquinone] flavoprotein 2, mitochondrial	NDUFV2	0.802267	0.041774
Q9H6U6	Breast carcinoma-amplified sequence 3	BCAS3	0.802222	0.000314685
O95400	CD2 antigen cytoplasmic tail-binding protein 2	CD2BP2	0.801687	0.0405687
Q96HD1	Protein disulfide isomerase CRELD1	CRELD1	0.801155	0.020157
Q9Y680	Peptidyl-prolyl cis-trans isomerase FKBP7	FKBP7	0.800311	9.76663e-05
O75970	Multiple PDZ domain protein	MPDZ	0.799513	0.00207222
O75940	Survival of motor neuron-related-splicing factor 30	SMNDC1	0.799486	0.0416492
Q96I99	Succinate--CoA ligase [GDP-forming] subunit beta, mitochondrial	SUCLG2	0.799057	0.00080371
Q9NVN3	Synembryn-B	RIC8B	0.798763	0.0312592
Q9UPN7	Serine/threonine-protein phosphatase 6 regulatory subunit 1	PPP6R1	0.798732	0.0119883
Q02388	Collagen alpha-1(VII) chain	COL7A1	0.798254	0.0349733
O75157	TSC22 domain family protein 2	TSC22D2	0.797886	0.0440616
Q9NVI1	Fanconi anemia group I protein	FANCI	0.797734	0.01648
Q12888	TP53-binding protein 1	TP53BP1	0.797187	0.00268657
Q9Y2E5	Epididymis-specific alpha-mannosidase	MAN2B2	0.796913	0.0434861
P0CG00	Putative zinc finger and SCAN domain-containing protein 5D	ZSCAN5DP	0.796755	0.00217686
Q9UNN8	Endothelial protein C receptor	PROCR	0.796582	0.000658892
Q9UEE9	Craniofacial development protein 1	CFDP1	0.79611	0.00127021
Q9P013	Spliceosome-associated protein CWC15 homolog	CWC15	0.796038	0.0200874
P27797	Calreticulin	CALR	0.795431	0.017334
P10253	Lysosomal alpha-glucosidase	GAA	0.795344	0.0119287
P62312	U6 snRNA-associated Sm-like protein LSm6	LSM6	0.79499	0.0483193
Q7Z7F7	39S ribosomal protein L55, mitochondrial	MRPL55	0.794749	0.0049181
Q9NVZ3	Adaptin ear-binding coat-associated protein 2	NECAP2	0.794131	0.0110443
Q5VUA4	Zinc finger protein 318	ZNF318	0.793971	0.00091411
P40261	Nicotinamide N-methyltransferase	NNMT	0.793925	0.0215611
P01889	HLA class I histocompatibility antigen, B alpha chain	HLA-B	0.793821	0.00259833
Q8NCH0	Carbohydrate sulfotransferase 14	CHST14	0.793262	0.0340537
Q8NEY8	Periphilin-1	PPHLN1	0.79308	0.00354265
P14209	CD99 antigen	CD99	0.793074	0.0413644
Q9Y692	Glucocorticoid modulatory element-binding protein 1	GMEB1	0.792902	0.0144267
O94762	ATP-dependent DNA helicase Q5	RECQL5	0.792901	0.00635308
Q9P0T7	Proton-transporting V-type ATPase complex assembly regulator TMEM9	TMEM9	0.792793	0.0297741
Q92733	Proline-rich protein PRCC	PRCC	0.792788	0.0198553
O00264	Membrane-associated progesterone receptor component 1	PGRMC1	0.792118	0.03553
O95084	Serine protease 23	PRSS23	0.792056	0.000957771
Q6ZT12	E3 ubiquitin-protein ligase UBR3	UBR3	0.791177	0.0323695
Q15370	Elongin-B	ELOB	0.790969	0.0256191
Q9Y657	Spindlin-1	SPIN1	0.790492	0.0245301
Q9NRF9	DNA polymerase epsilon subunit 3	POLE3	0.790103	0.0139676
O94952	F-box only protein 21	FBXO21	0.789889	0.0205328
Q70EL1	Inactive ubiquitin carboxyl-terminal hydrolase 54	USP54	0.789815	0.0103044
O43760	Synaptogyrin-2	SYNGR2	0.789749	0.000382868
Q96RK0	Protein capicua homolog	CIC	0.78967	0.0368639
Q5TC12	ATP synthase mitochondrial F1 complex assembly factor 1	ATPAF1	0.789592	0.00850768
Q9Y294	Histone chaperone ASF1A	ASF1A	0.789484	0.0211777
Q9Y4K0	Lysyl oxidase homolog 2	LOXL2	0.789348	0.0378739
P53701	Cytochrome c-type heme lyase	HCCS	0.789201	0.00227669
P43362	Melanoma-associated antigen 9	MAGEA9	0.789156	0.00498709
P43307	Translocon-associated protein subunit alpha	SSR1	0.789121	0.0337877
P61604	10 kDa heat shock protein, mitochondrial	HSPE1	0.788133	0.0223057
Q8WTW3	Conserved oligomeric Golgi complex subunit 1	COG1	0.787548	0.00451848
Q8IYQ7	Threonine synthase-like 1	THNSL1	0.787482	0.021232
Q5PRF9	Protein Smaug homolog 2	SAMD4B	0.787043	0.0300401
Q9Y2H6	Fibronectin type-III domain-containing protein 3A	FNDC3A	0.786991	0.00356358
Q86VE9	Serine incorporator 5	SERINC5	0.786968	0.005689
Q15059	Bromodomain-containing protein 3	BRD3	0.786694	0.00163696
Q9BSV6	tRNA-splicing endonuclease subunit Sen34	TSEN34	0.7864	0.0325626
Q15819	Ubiquitin-conjugating enzyme E2 variant 2	UBE2V2	0.786351	0.0121162
Q9BX63	Fanconi anemia group J protein	BRIP1	0.786305	0.0233389
Q9UJY4	ADP-ribosylation factor-binding protein GGA2	GGA2	0.786289	0.00530472
Q8IVL6	Prolyl 3-hydroxylase 3	P3H3	0.78621	0.00226985
Q96EY8	Corrinoid adenosyltransferase	MMAB	0.785582	0.0173874
Q9UBB4	Ataxin-10	ATXN10	0.785356	0.00806515
Q9Y421	Protein FAM32A	FAM32A	0.784497	0.0413993
Q5VSY0	G kinase-anchoring protein 1	GKAP1	0.784293	0.000738665
Q9BRG1	Vacuolar protein-sorting-associated protein 25	VPS25	0.784052	0.0359302
Q02318	Sterol 26-hydroxylase, mitochondrial	CYP27A1	0.783951	0.0344805
Q8IXL7	Methionine-R-sulfoxide reductase B3	MSRB3	0.783865	0.00849947
Q9NXV2	BTB/POZ domain-containing protein KCTD5	KCTD5	0.782917	0.0136812
O00213	Amyloid-beta A4 precursor protein-binding family B member 1	APBB1	0.78283	0.0146846
Q6SPF0	Atherin	SAMD1	0.782435	0.000876408
Q09028	Histone-binding protein RBBP4	RBBP4	0.782299	0.0190734
P14854	Cytochrome c oxidase subunit 6B1	COX6B1	0.78111	0.0393953
O75891	Cytosolic 10-formyltetrahydrofolate dehydrogenase	ALDH1L1	0.781029	0.00479816
Q9C0B7	Transport and Golgi organization protein 6 homolog	TANGO6	0.780103	0.0276595
Q6P5Z2	Serine/threonine-protein kinase N3	PKN3	0.779743	0.0199768
O75362	Zinc finger protein 217	ZNF217	0.779102	0.0118368
Q9NYM9	BET1-like protein	BET1L	0.778963	0.0495073
Q9BVC5	Ashwin	C2orf49	0.778711	0.0102864
Q6ZWJ1	Syntaxin-binding protein 4	STXBP4	0.77866	0.00048888
Q93063	Exostosin-2	EXT2	0.778512	0.00204534
P13073	Cytochrome c oxidase subunit 4 isoform 1, mitochondrial	COX4I1	0.778375	0.00162068
Q8IXQ4	GPALPP motifs-containing protein 1	GPALPP1	0.778031	0.00162776
Q99426	Tubulin-folding cofactor B	TBCB	0.777933	0.00274685
Q9BTT0	Acidic leucine-rich nuclear phosphoprotein 32 family member E	ANP32E	0.777669	0.0294145
Q9NRZ9	Lymphoid-specific helicase	HELLS	0.777458	5.24909e-05
Q712K3	Ubiquitin-conjugating enzyme E2 R2	UBE2R2	0.777443	0.0181021
P04818	Thymidylate synthase	TYMS	0.777408	0.0221641
Q92597	Protein NDRG1	NDRG1	0.776324	0.0144538
Q9UL33	Trafficking protein particle complex subunit 2-like protein	TRAPPC2L	0.776304	0.0174277
Q14012	Calcium/calmodulin-dependent protein kinase type 1	CAMK1	0.77568	0.026201
Q92994	Transcription factor IIIB 90 kDa subunit	BRF1	0.77545	0.0211852
Q14493	Histone RNA hairpin-binding protein	SLBP	0.775396	0.0256773
P60660	Myosin light polypeptide 6	MYL6	0.774369	0.038594
Q9BXK5	Bcl-2-like protein 13	BCL2L13	0.77433	0.0122629
Q9NZI8	Insulin-like growth factor 2 mRNA-binding protein 1	IGF2BP1	0.773996	0.00898126
Q9P2K3	REST corepressor 3	RCOR3	0.773033	0.00198289
O95721	Synaptosomal-associated protein 29	SNAP29	0.772792	0.0416164
Q9H900	Protein zwilch homolog	ZWILCH	0.772645	0.00814612
Q6AI12	Ankyrin repeat domain-containing protein 40	ANKRD40	0.772232	0.0223383
P67775	Serine/threonine-protein phosphatase 2A catalytic subunit alpha isoform	PPP2CA	0.771543	0.0315673
O75554	WW domain-binding protein 4	WBP4	0.771534	0.0285445
O75787	Renin receptor	ATP6AP2	0.771334	0.0327955
P22607	Fibroblast growth factor receptor 3	FGFR3	0.771322	0.00738135
Q8WUY3	Protein prune homolog 2	PRUNE2	0.770532	0.0206224
P35249	Replication factor C subunit 4	RFC4	0.77007	0.0369486
P35556	Fibrillin-2	FBN2	0.769946	0.00303762
Q53EL6	Programmed cell death protein 4	PDCD4	0.769944	0.00301979
P16144	Integrin beta-4	ITGB4	0.76989	0.00110404
Q8TBF4	Zinc finger CCHC-type and RNA-binding motif-containing protein 1	ZCRB1	0.769563	0.0067334
O95865	N(G),N(G)-dimethylarginine dimethylaminohydrolase 2	DDAH2	0.769558	0.00879681
Q8IVF7	Formin-like protein 3	FMNL3	0.769308	0.0175224
Q86SX6	Glutaredoxin-related protein 5, mitochondrial	GLRX5	0.769146	0.0449045
Q9NP61	ADP-ribosylation factor GTPase-activating protein 3	ARFGAP3	0.768751	5.84159e-05
Q14571	Inositol 1,4,5-trisphosphate receptor type 2	ITPR2	0.767935	0.0475747
Q9UP83	Conserved oligomeric Golgi complex subunit 5	COG5	0.767269	0.0102665
Q8WW01	tRNA-splicing endonuclease subunit Sen15	TSEN15	0.767087	0.00731808
Q8TDW7	Protocadherin Fat 3	FAT3	0.766324	0.00609577
P82970	High mobility group nucleosome-binding domain-containing protein 5	HMGN5	0.766121	0.0298753
O00273	DNA fragmentation factor subunit alpha	DFFA	0.765794	0.00819275
Q13356	RING-type E3 ubiquitin-protein ligase PPIL2	PPIL2	0.765492	0.0451
Q9P121	Neurotrimin	NTM	0.765386	0.0142788
Q96MW1	Coiled-coil domain-containing protein 43	CCDC43	0.765364	0.049574
Q8N4Q1	Mitochondrial intermembrane space import and assembly protein 40	CHCHD4	0.764837	0.00772454
P15586	N-acetylglucosamine-6-sulfatase	GNS	0.764835	0.0176589
P61457	Pterin-4-alpha-carbinolamine dehydratase	PCBD1	0.764667	0.00245887
P09382	Galectin-1	LGALS1	0.764119	0.00695389
Q68CZ6	HAUS augmin-like complex subunit 3	HAUS3	0.763065	0.0265065
Q9BQ70	Transcription factor 25	TCF25	0.762434	0.0367901
Q14814	Myocyte-specific enhancer factor 2D	MEF2D	0.761973	0.00687745
Q9GZT3	SRA stem-loop-interacting RNA-binding protein, mitochondrial	SLIRP	0.761406	0.0380388
Q9GZN7	Protein rogdi homolog	ROGDI	0.759475	0.00767385
P05186	Alkaline phosphatase, tissue-nonspecific isozyme	ALPL	0.758862	0.0240592
O95864	Acyl-CoA 6-desaturase	FADS2	0.758432	0.0298095
O75976	Carboxypeptidase D	CPD	0.757368	0.0117454
Q6EMK4	Vasorin	VASN	0.756661	0.0106186
Q96GX5	Serine/threonine-protein kinase greatwall	MASTL	0.75638	0.0345367
Q13530	Serine incorporator 3	SERINC3	0.75619	0.00621048
P63272	Transcription elongation factor SPT4	SUPT4H1	0.754952	0.00170355
Q9BVW5	TIMELESS-interacting protein	TIPIN	0.754845	0.0216324
Q9Y6K1	DNA (cytosine-5)-methyltransferase 3A	DNMT3A	0.754117	0.0128087
A0A0U1RRE5	Negative regulator of P-body association	NBDY	0.753567	0.0472774
P34059	N-acetylgalactosamine-6-sulfatase	GALNS	0.75347	0.0152147
Q16254	Transcription factor E2F4	E2F4	0.753412	0.00810983
P23511	Nuclear transcription factor Y subunit alpha	NFYA	0.753351	0.00817928
P04626	Receptor tyrosine-protein kinase erbB-2	ERBB2	0.752902	0.00219461
P09486	SPARC	SPARC	0.752509	0.0195173
Q96BR5	Cytochrome c oxidase assembly factor 7	COA7	0.75198	0.0151869
Q9UKY7	Protein CDV3 homolog	CDV3	0.751752	0.0224672
P05067	Amyloid-beta precursor protein	APP	0.751748	0.00243096
Q9UI30	Multifunctional methyltransferase subunit TRM112-like protein	TRMT112	0.751461	0.0281605
O94964	Protein SOGA1	SOGA1	0.75111	0.0077948
Q09472	Histone acetyltransferase p300	EP300	0.750677	0.00209146
Q9Y478	5'-AMP-activated protein kinase subunit beta-1	PRKAB1	0.750555	0.0397182
O15164	Transcription intermediary factor 1-alpha	TRIM24	0.750503	0.0486756
Q9BTY2	Plasma alpha-L-fucosidase	FUCA2	0.749294	0.00661419
O43236	Septin-4	SEPTIN4	0.749211	0.0211116
P51649	Succinate-semialdehyde dehydrogenase, mitochondrial	ALDH5A1	0.749191	0.00742289
Q9UK45	U6 snRNA-associated Sm-like protein LSm7	LSM7	0.748596	0.00132572
O43181	NADH dehydrogenase [ubiquinone] iron-sulfur protein 4, mitochondrial	NDUFS4	0.74736	0.00541505
O75792	Ribonuclease H2 subunit A	RNASEH2A	0.746451	0.0405585
P11717	Cation-independent mannose-6-phosphate receptor	IGF2R	0.746447	0.00128705
Q02078	Myocyte-specific enhancer factor 2A	MEF2A	0.746367	0.0168909
Q8TCT0	Ceramide kinase	CERK	0.74623	0.0129479
Q14249	Endonuclease G, mitochondrial	ENDOG	0.745986	0.00614722
P62760	Visinin-like protein 1	VSNL1	0.745851	0.0180552
Q8N3J9	Zinc finger protein 664	ZNF664	0.745764	0.00795193
Q13185	Chromobox protein homolog 3	CBX3	0.745445	0.00107369
P30049	ATP synthase subunit delta, mitochondrial	ATP5F1D	0.745062	0.0499268
Q7L0J3	Synaptic vesicle glycoprotein 2A	SV2A	0.744894	0.0114772
Q13615	Myotubularin-related protein 3	MTMR3	0.744382	0.0102156
P78536	Disintegrin and metalloproteinase domain-containing protein 17	ADAM17	0.74416	0.00697116
Q8IZ13	Protein ZBED8	ZBED8	0.743969	0.0481102
Q9Y3E1	Hepatoma-derived growth factor-related protein 3	HDGFL3	0.743935	0.00640344
Q9H6X2	Anthrax toxin receptor 1	ANTXR1	0.743883	0.0106981
Q96K17	Transcription factor BTF3 homolog 4	BTF3L4	0.743851	0.0138089
Q96A57	Transmembrane protein 230	TMEM230	0.743273	0.0012187
Q5PSV4	Breast cancer metastasis-suppressor 1-like protein	BRMS1L	0.742948	0.000341199
Q9NYB9	Abl interactor 2	ABI2	0.741902	0.0285528
O60565	Gremlin-1	GREM1	0.740769	0.0363564
Q7Z6M1	Rab9 effector protein with kelch motifs	RABEPK	0.740399	0.0193311
Q5SZD1	Uncharacterized protein C6orf141	C6orf141	0.740163	0.0413274
P51687	Sulfite oxidase, mitochondrial	SUOX	0.73953	0.0126278
P52943	Cysteine-rich protein 2	CRIP2	0.738569	0.00784668
Q8TF66	Leucine-rich repeat-containing protein 15	LRRC15	0.737679	0.00135856
Q14938	Nuclear factor 1 X-type	NFIX	0.737339	6.53513e-05
P46019	Phosphorylase b kinase regulatory subunit alpha, liver isoform	PHKA2	0.737313	0.02315
Q8TDP1	Ribonuclease H2 subunit C	RNASEH2C	0.7369	0.00299886
Q9NX14	NADH dehydrogenase [ubiquinone] 1 beta subcomplex subunit 11, mitochondrial	NDUFB11	0.736487	0.0456548
Q53GT1	Kelch-like protein 22	KLHL22	0.736209	0.00528556
Q8WUA7	TBC1 domain family member 22A	TBC1D22A	0.734389	0.00765222
O15014	Zinc finger protein 609	ZNF609	0.734212	0.0162282
Q08380	Galectin-3-binding protein	LGALS3BP	0.7332	0.00806382
Q9HCN4	GPN-loop GTPase 1	GPN1	0.732968	0.000878841
P62487	DNA-directed RNA polymerase II subunit RPB7	POLR2G	0.732455	0.0025883
Q96DC7	Transmembrane and coiled-coil domain-containing protein 6	TMCO6	0.732329	0.0154466
O14777	Kinetochore protein NDC80 homolog	NDC80	0.732311	0.0281978
Q9BUA3	Spindlin interactor and repressor of chromatin-binding protein	SPINDOC	0.732292	0.00336995
Q71H61	Immunoglobulin-like domain-containing receptor 2	ILDR2	0.732278	0.0220921
A1Z1Q3	ADP-ribose glycohydrolase MACROD2	MACROD2	0.730558	0.0321964
P00813	Adenosine deaminase	ADA	0.730161	0.00934073
Q9BX68	Histidine triad nucleotide-binding protein 2, mitochondrial	HINT2	0.729521	0.0215392
Q9H9S5	Fukutin-related protein	FKRP	0.728934	0.00216932
Q9UBT6	DNA polymerase kappa	POLK	0.728894	0.0463705
Q9NWZ3	Interleukin-1 receptor-associated kinase 4	IRAK4	0.728704	0.00564114
Q8IZA0	Dyslexia-associated protein KIAA0319-like protein	KIAA0319L	0.72673	0.00455054
Q6ZUT6	Coiled-coil domain-containing protein 9B	CCDC9B	0.725836	0.0261149
P42773	Cyclin-dependent kinase 4 inhibitor C	CDKN2C	0.725525	0.0168633
P48723	Heat shock 70 kDa protein 13	HSPA13	0.724565	0.00143278
Q96II8	DISP complex protein LRCH3	LRCH3	0.724558	0.00559825
P63098	Calcineurin subunit B type 1	PPP3R1	0.724028	0.0332776
P07311	Acylphosphatase-1	ACYP1	0.723925	0.026793
P62857	40S ribosomal protein S28	RPS28	0.723819	0.00337082
O75368	SH3 domain-binding glutamic acid-rich-like protein	SH3BGRL	0.723799	0.00577252
Q9Y6X4	Soluble lamin-associated protein of 75 kDa	FAM169A	0.723454	0.0396699
O94782	Ubiquitin carboxyl-terminal hydrolase 1	USP1	0.723279	0.00538145
Q9UHQ1	Nuclear prelamin A recognition factor	NARF	0.723116	0.00291598
Q6YHK3	CD109 antigen	CD109	0.723022	0.00275313
Q9NXR1	Nuclear distribution protein nudE homolog 1	NDE1	0.722845	0.0120698
Q9BYC9	39S ribosomal protein L20, mitochondrial	MRPL20	0.722358	0.02349
Q13438	Protein OS-9	OS9	0.722306	0.00031334
Q9NQH7	Xaa-Pro aminopeptidase 3	XPNPEP3	0.722158	0.00605114
P45973	Chromobox protein homolog 5	CBX5	0.720938	0.00399321
O95834	Echinoderm microtubule-associated protein-like 2	EML2	0.720407	0.0030532
Q9HCJ0	Trinucleotide repeat-containing gene 6C protein	TNRC6C	0.720308	0.00700579
P56559	ADP-ribosylation factor-like protein 4C	ARL4C	0.720074	0.00729846
Q86T65	Disheveled-associated activator of morphogenesis 2	DAAM2	0.719794	0.000364128
P41229	Lysine-specific demethylase 5C	KDM5C	0.719236	0.00258234
Q96G28	Cilia- and flagella-associated protein 36	CFAP36	0.719212	0.0154231
Q5JUR7	Testis-expressed protein 30	TEX30	0.719039	0.00343448
O00470	Homeobox protein Meis1	MEIS1	0.718028	0.013623
Q86XX4	Extracellular matrix protein FRAS1	FRAS1	0.716274	7.3661e-05
P06865	Beta-hexosaminidase subunit alpha	HEXA	0.715262	0.0230111
O43169	Cytochrome b5 type B	CYB5B	0.714708	0.000865605
Q9NR56	Muscleblind-like protein 1	MBNL1	0.714154	0.0361469
P40306	Proteasome subunit beta type-10	PSMB10	0.714136	0.0288467
P07686	Beta-hexosaminidase subunit beta	HEXB	0.714112	0.000895963
P55055	Oxysterols receptor LXR-beta	NR1H2	0.713558	0.00780621
Q9UFW8	CGG triplet repeat-binding protein 1	CGGBP1	0.713253	0.0174687
O15182	Centrin-3	CETN3	0.711012	0.0061716
Q8TB22	Spermatogenesis-associated protein 20	SPATA20	0.710844	0.021007
Q92545	Transmembrane protein 131	TMEM131	0.710216	0.0259583
Q13952	Nuclear transcription factor Y subunit gamma	NFYC	0.707788	0.0269848
Q9Y519	Transmembrane protein 184B	TMEM184B	0.707484	0.0279078
O00244	Copper transport protein ATOX1	ATOX1	0.707114	0.0338705
Q9BQG2	NAD-capped RNA hydrolase NUDT12	NUDT12	0.706935	0.0464414
A6ZKI3	Retrotransposon Gag-like protein 8C	RTL8C	0.70595	0.0190227
O43505	Beta-1,4-glucuronyltransferase 1	B4GAT1	0.70481	0.00439577
Q12968	Nuclear factor of activated T-cells, cytoplasmic 3	NFATC3	0.704441	0.0338342
P35250	Replication factor C subunit 2	RFC2	0.702961	0.0157501
Q15119	[Pyruvate dehydrogenase (acetyl-transferring)] kinase isozyme 2, mitochondrial	PDK2	0.702761	0.040111
Q8NBT2	Kinetochore protein Spc24	SPC24	0.702165	0.0185617
Q9Y333	U6 snRNA-associated Sm-like protein LSm2	LSM2	0.701141	0.00635726
Q9H0F6	Sharpin	SHARPIN	0.700255	0.0066585
Q14011	Cold-inducible RNA-binding protein	CIRBP	0.698947	0.0289124
P41208	Centrin-2	CETN2	0.696666	0.024318
Q86UP3	Zinc finger homeobox protein 4	ZFHX4	0.694588	0.00273715
P78330	Phosphoserine phosphatase	PSPH	0.694034	0.00244874
Q96NE9	FERM domain-containing protein 6	FRMD6	0.693912	0.00116583
Q9P227	Rho GTPase-activating protein 23	ARHGAP23	0.693298	0.013234
Q92804	TATA-binding protein-associated factor 2N	TAF15	0.69229	0.00100022
Q00403	Transcription initiation factor IIB	GTF2B	0.692256	0.000149608
P19419	ETS domain-containing protein Elk-1	ELK1	0.691986	0.0209395
Q15652	Probable JmjC domain-containing histone demethylation protein 2C	JMJD1C	0.691984	0.0165062
O95210	Starch-binding domain-containing protein 1	STBD1	0.691485	0.0101555
B4DU55	Zinc finger protein 879	ZNF879	0.69131	0.00545305
Q6VEQ5	WAS protein family homolog 2	WASH2P	0.69129	0.036368
Q9H6B4	CXADR-like membrane protein	CLMP	0.691286	0.0180605
Q9GZT4	Serine racemase	SRR	0.690537	0.00620607
P29966	Myristoylated alanine-rich C-kinase substrate	MARCKS	0.690224	0.0143815
P35613	Basigin	BSG	0.689592	0.00130698
P10321	HLA class I histocompatibility antigen, C alpha chain	HLA-C	0.688279	0.0108093
Q9BRK5	45 kDa calcium-binding protein	SDF4	0.687968	0.0151206
O00483	Cytochrome c oxidase subunit NDUFA4	NDUFA4	0.686813	0.00567107
P15104	Glutamine synthetase	GLUL	0.685807	0.00167269
Q9NZ53	Podocalyxin-like protein 2	PODXL2	0.685534	0.0389005
P18084	Integrin beta-5	ITGB5	0.68553	0.0371666
P13591	Neural cell adhesion molecule 1	NCAM1	0.685028	0.0114268
Q5EBL8	PDZ domain-containing protein 11	PDZD11	0.684219	0.0455402
Q9UKX5	Integrin alpha-11	ITGA11	0.682526	0.00463886
Q01459	Di-N-acetylchitobiase	CTBS	0.68248	0.0335578
Q6VMQ6	Activating transcription factor 7-interacting protein 1	ATF7IP	0.682104	0.0115559
P25963	NF-kappa-B inhibitor alpha	NFKBIA	0.681694	0.00746723
Q00973	Beta-1,4 N-acetylgalactosaminyltransferase 1	B4GALNT1	0.679606	0.00221632
P35251	Replication factor C subunit 1	RFC1	0.679529	0.0131735
P43356	Melanoma-associated antigen 2	MAGEA2	0.67819	0.00092899
P55899	IgG receptor FcRn large subunit p51	FCGRT	0.675841	0.0203917
Q9UKI2	Cdc42 effector protein 3	CDC42EP3	0.675417	0.0366623
P47895	Aldehyde dehydrogenase family 1 member A3	ALDH1A3	0.675136	0.0118367
Q5H9U9	Probable ATP-dependent RNA helicase DDX60-like	DDX60L	0.673932	0.0497244
Q9H792	Inactive tyrosine-protein kinase PEAK1	PEAK1	0.673408	0.0119217
Q9NRX4	14 kDa phosphohistidine phosphatase	PHPT1	0.673404	0.000997266
Q5BJF6	Outer dense fiber protein 2	ODF2	0.671983	0.0377701
Q99487	Platelet-activating factor acetylhydrolase 2, cytoplasmic	PAFAH2	0.67118	0.0158064
Q6UXH1	Protein disulfide isomerase CRELD2	CRELD2	0.670597	0.00516987
Q9H446	RWD domain-containing protein 1	RWDD1	0.670527	0.00594041
Q13510	Acid ceramidase	ASAH1	0.669866	0.0011852
Q96CM3	Mitochondrial RNA pseudouridine synthase RPUSD4	RPUSD4	0.669853	0.0409031
P27482	Calmodulin-like protein 3	CALML3	0.669781	0.0275439
O15460	Prolyl 4-hydroxylase subunit alpha-2	P4HA2	0.667662	0.000454497
O60337	E3 ubiquitin-protein ligase MARCHF6	MARCHF6	0.666715	0.00277029
P02649	Apolipoprotein E	APOE	0.666195	0.0190542
P01911	HLA class II histocompatibility antigen, DRB1 beta chain	HLA-DRB1	0.665263	0.00206906
P56378	ATP synthase subunit ATP5MPL, mitochondrial	ATP5MPL	0.664956	0.0180639
Q8NI22	Multiple coagulation factor deficiency protein 2	MCFD2	0.664574	0.0184501
P10619	Lysosomal protective protein	CTSA	0.664275	0.00134681
Q8IYW5	E3 ubiquitin-protein ligase RNF168	RNF168	0.662974	0.000168586
P37108	Signal recognition particle 14 kDa protein	SRP14	0.662883	0.0255021
P63208	S-phase kinase-associated protein 1	SKP1	0.662367	0.0173908
Q96BT7	Alkylated DNA repair protein alkB homolog 8	ALKBH8	0.661592	0.00389318
Q6P387	Uncharacterized protein C16orf46	C16orf46	0.661188	0.0171217
P40937	Replication factor C subunit 5	RFC5	0.661142	0.0323508
P50895	Basal cell adhesion molecule	BCAM	0.660977	0.0125086
P55268	Laminin subunit beta-2	LAMB2	0.660138	0.0322161
Q9UBQ6	Exostosin-like 2	EXTL2	0.658868	0.00114524
P11047	Laminin subunit gamma-1	LAMC1	0.658459	0.00516893
Q9HB40	Retinoid-inducible serine carboxypeptidase	SCPEP1	0.658167	0.023261
Q96AT1	Uncharacterized protein KIAA1143	KIAA1143	0.656721	0.0125064
P82094	TATA element modulatory factor	TMF1	0.656439	0.0129928
Q92622	Run domain Beclin-1-interacting and cysteine-rich domain-containing protein	RUBCN	0.655698	0.00354913
P43003	Excitatory amino acid transporter 1	SLC1A3	0.655067	0.00133596
P17568	NADH dehydrogenase [ubiquinone] 1 beta subcomplex subunit 7	NDUFB7	0.654926	0.0450664
Q9BWJ5	Splicing factor 3B subunit 5	SF3B5	0.654666	0.00110269
Q92896	Golgi apparatus protein 1	GLG1	0.654242	0.00380899
Q9BY42	Replication termination factor 2	RTF2	0.653656	0.00199467
O60613	Selenoprotein F	SELENOF	0.653094	0.00199709
Q86VW0	SEC14 domain and spectrin repeat-containing protein 1	SESTD1	0.652441	0.000728637
P0DP25	Calmodulin-3	CALM3	0.652378	0.0118246
P55287	Cadherin-11	CDH11	0.651828	0.00152697
Q9NNX1	Tuftelin	TUFT1	0.649988	0.0230756
Q9NQZ6	Zinc finger C4H2 domain-containing protein	ZC4H2	0.64989	0.024248
Q92506	Estradiol 17-beta-dehydrogenase 8	HSD17B8	0.648712	0.019449
Q9NYB0	Telomeric repeat-binding factor 2-interacting protein 1	TERF2IP	0.646547	0.00106361
P69849	Nodal modulator 3	NOMO3	0.646538	0.0112837
Q6PJG6	BRCA1-associated ATM activator 1	BRAT1	0.646493	0.00235121
Q86UE4	Protein LYRIC	MTDH	0.646004	0.000423806
Q9P0P0	E3 ubiquitin-protein ligase RNF181	RNF181	0.644365	0.00142459
Q9H0U9	Testis-specific Y-encoded-like protein 1	TSPYL1	0.643974	0.00778077
Q9H063	Repressor of RNA polymerase III transcription MAF1 homolog	MAF1	0.643089	0.00157536
Q9NZV5	Selenoprotein N	SELENON	0.64121	0.00471408
P04439	HLA class I histocompatibility antigen, A alpha chain	HLA-A	0.641162	7.85489e-05
Q8N4N3	Kelch-like protein 36	KLHL36	0.640478	0.0224909
Q9BWL3	Protein C1orf43	C1orf43	0.640119	0.00380395
Q8TAD7	Overexpressed in colon carcinoma 1 protein	OCC1	0.639667	0.00811708
P61769	Beta-2-microglobulin	B2M	0.638834	0.00981052
P40938	Replication factor C subunit 3	RFC3	0.638313	0.0331518
Q9UHR5	SAP30-binding protein	SAP30BP	0.637114	0.00594075
Q9NQA3	WAS protein family homolog 6	WASH6P	0.636135	0.0191539
Q9Y646	Carboxypeptidase Q	CPQ	0.635357	0.000998873
A6NMZ7	Collagen alpha-6(VI) chain	COL6A6	0.634792	0.00348988
A4D1U4	DENN domain-containing protein 11	DENND11	0.633671	0.0101921
P48436	Transcription factor SOX-9	SOX9	0.633667	0.0210716
O14492	SH2B adapter protein 2	SH2B2	0.632733	0.0485667
Q9BXS6	Nucleolar and spindle-associated protein 1	NUSAP1	0.631733	0.00132449
Q7Z3D4	LysM and putative peptidoglycan-binding domain-containing protein 3	LYSMD3	0.629054	0.00251689
Q7Z4G1	COMM domain-containing protein 6	COMMD6	0.627805	0.00877381
Q5T4B2	Inactive glycosyltransferase 25 family member 3	CERCAM	0.626711	0.00268869
Q9BQ61	Telomerase RNA component interacting RNase	TRIR	0.62657	0.00832313
P13987	CD59 glycoprotein	CD59	0.626424	0.00223791
P0CG39	POTE ankyrin domain family member J	POTEJ	0.624275	0.0304876
Q9NPD8	Ubiquitin-conjugating enzyme E2 T	UBE2T	0.623786	0.0111221
P05114	Non-histone chromosomal protein HMG-14	HMGN1	0.623662	0.0178527
Q9BZL1	Ubiquitin-like protein 5	UBL5	0.623552	0.00205401
O14933	Ubiquitin/ISG15-conjugating enzyme E2 L6	UBE2L6	0.622196	0.00356683
Q92503	SEC14-like protein 1	SEC14L1	0.621794	0.00983031
P38571	Lysosomal acid lipase/cholesteryl ester hydrolase	LIPA	0.619695	0.00827743
O43493	Trans-Golgi network integral membrane protein 2	TGOLN2	0.61871	0.0214905
O75164	Lysine-specific demethylase 4A	KDM4A	0.618559	0.00210127
P33552	Cyclin-dependent kinases regulatory subunit 2	CKS2	0.616365	0.00208398
Q8TEY7	Ubiquitin carboxyl-terminal hydrolase 33	USP33	0.613892	0.0180528
P12110	Collagen alpha-2(VI) chain	COL6A2	0.613145	0.014897
Q969T4	Ubiquitin-conjugating enzyme E2 E3	UBE2E3	0.611925	0.00128012
Q9BZM5	UL16-binding protein 2	ULBP2	0.611076	3.7086e-05
P14406	Cytochrome c oxidase subunit 7A2, mitochondrial	COX7A2	0.609553	0.0111122
P08253	72 kDa type IV collagenase	MMP2	0.609518	0.00403428
Q9UER7	Death domain-associated protein 6	DAXX	0.6079	0.0372285
P43308	Translocon-associated protein subunit beta	SSR2	0.606683	0.0305245
Q4J6C6	Prolyl endopeptidase-like	PREPL	0.60613	0.00447512
P16035	Metalloproteinase inhibitor 2	TIMP2	0.60473	0.0128492
P43355	Melanoma-associated antigen 1	MAGEA1	0.60424	0.0110293
Q96MW5	Conserved oligomeric Golgi complex subunit 8	COG8	0.603301	0.00551126
Q9H9D4	Zinc finger protein 408	ZNF408	0.599217	0.000694821
P45452	Collagenase 3	MMP13	0.598347	0.0311806
Q9UJU3	Zinc finger protein 112	ZNF112	0.598264	0.0416852
Q86VP3	Phosphofurin acidic cluster sorting protein 2	PACS2	0.5977	0.000424199
Q9Y244	Proteasome maturation protein	POMP	0.595029	0.0328824
Q9Y5N6	Origin recognition complex subunit 6	ORC6	0.594714	0.00656221
P12109	Collagen alpha-1(VI) chain	COL6A1	0.590625	0.00955918
Q8TB72	Pumilio homolog 2	PUM2	0.590294	0.00384028
Q96GP6	Scavenger receptor class F member 2	SCARF2	0.589525	0.00818571
P01034	Cystatin-C	CST3	0.588243	0.0141931
Q8IZQ5	Selenoprotein H	SELENOH	0.587398	0.00264378
Q9NP97	Dynein light chain roadblock-type 1	DYNLRB1	0.586849	0.0256354
Q9NX18	Succinate dehydrogenase assembly factor 2, mitochondrial	SDHAF2	0.584575	0.00698887
Q7Z7C8	Transcription initiation factor TFIID subunit 8	TAF8	0.584326	0.00428695
Q9UKK6	NTF2-related export protein 1	NXT1	0.583247	0.0290315
Q99715	Collagen alpha-1(XII) chain	COL12A1	0.582105	0.0113776
P81274	G-protein-signaling modulator 2	GPSM2	0.581873	0.00163608
P24311	Cytochrome c oxidase subunit 7B, mitochondrial	COX7B	0.581833	0.013575
O60830	Mitochondrial import inner membrane translocase subunit Tim17-B	TIMM17B	0.581405	0.019696
P06454	Prothymosin alpha	PTMA	0.577364	0.0270534
Q7Z3S9	Notch homolog 2 N-terminal-like protein A	NOTCH2NLA	0.577254	0.00110688
O14548	Cytochrome c oxidase subunit 7A-related protein, mitochondrial	COX7A2L	0.575781	0.0138063
Q9H492	Microtubule-associated proteins 1A/1B light chain 3A	MAP1LC3A	0.575448	0.00171009
P04035	3-hydroxy-3-methylglutaryl-coenzyme A reductase	HMGCR	0.571828	0.00695523
P02452	Collagen alpha-1(I) chain	COL1A1	0.571706	0.000423063
Q07352	mRNA decay activator protein ZFP36L1	ZFP36L1	0.566086	0.0018797
Q9Y5V3	Melanoma-associated antigen D1	MAGED1	0.565477	0.00717161
Q9Y617	Phosphoserine aminotransferase	PSAT1	0.564329	0.00053209
Q9BYJ0	Fibroblast growth factor-binding protein 2	FGFBP2	0.562554	0.00108423
Q8N6Y2	Leucine-rich repeat-containing protein 17	LRRC17	0.56093	0.000199373
Q99519	Sialidase-1	NEU1	0.559783	0.00379992
Q9BRK3	Matrix remodeling-associated protein 8	MXRA8	0.553463	0.0162684
Q9UI38	Probable threonine protease PRSS50	PRSS50	0.552817	0.0182859
P61916	NPC intracellular cholesterol transporter 2	NPC2	0.548647	0.00308822
O43175	D-3-phosphoglycerate dehydrogenase	PHGDH	0.545878	2.68834e-05
Q9NQ92	Coordinator of PRMT5 and differentiation stimulator	COPRS	0.545355	0.0294263
P17544	Cyclic AMP-dependent transcription factor ATF-7	ATF7	0.541922	0.012218
Q99538	Legumain	LGMN	0.541746	0.00624501
O95229	ZW10 interactor	ZWINT	0.540499	0.0213725
P05997	Collagen alpha-2(V) chain	COL5A2	0.534951	6.3394e-05
Q9BRQ0	Pygopus homolog 2	PYGO2	0.530548	0.00867534
O00115	Deoxyribonuclease-2-alpha	DNASE2	0.523546	0.00608616
P15289	Arylsulfatase A	ARSA	0.522648	0.0026586
O75496	Geminin	GMNN	0.522073	0.00916967
Q9UD71	Protein phosphatase 1 regulatory subunit 1B	PPP1R1B	0.517381	0.00373286
Q96CG8	Collagen triple helix repeat-containing protein 1	CTHRC1	0.517073	0.0168293
Q9Y303	N-acetylglucosamine-6-phosphate deacetylase	AMDHD2	0.510647	0.0291874
Q01664	Transcription factor AP-4	TFAP4	0.508515	0.0320888
O00488	Zinc finger protein 593	ZNF593	0.50754	0.00281932
Q9P021	Cysteine-rich PDZ-binding protein	CRIPT	0.506016	0.0154807
P12107	Collagen alpha-1(XI) chain	COL11A1	0.499642	0.0053295
P05109	Protein S100-A8	S100A8	0.493106	0.00693218
O76095	Protein JTB	JTB	0.493063	0.00639081
P20908	Collagen alpha-1(V) chain	COL5A1	0.492162	0.0102494
Q9GZX9	Twisted gastrulation protein homolog 1	TWSG1	0.47681	0.00156058
Q12841	Follistatin-related protein 1	FSTL1	0.460825	0.00042488
O76080	AN1-type zinc finger protein 5	ZFAND5	0.431016	0.000136373
Q15113	Procollagen C-endopeptidase enhancer 1	PCOLCE	0.425343	0.0106367
Q4V9L6	Transmembrane protein 119	TMEM119	0.421537	0.001724
P56178	Homeobox protein DLX-5	DLX5	0.400147	0.0441992
P21741	Midkine	MDK	0.395193	0.000706382
Q8N130	Sodium-dependent phosphate transport protein 2C	SLC34A3	0.37729	0.00466195
Q9H4X1	Regulator of cell cycle RGCC	RGCC	0.376761	0.000634343
Q6FIF0	AN1-type zinc finger protein 6	ZFAND6	0.361088	3.48802e-05
Q96SY0	Integrator complex subunit 14	INTS14	0.35713	0.0229301
