# Supplementary material for: Ailanthone Inhibits Proliferation, Migration and Invasion of Osteosarcoma Cells by Downregulating the Serine Biosynthetic Pathway
Source: Front Oncol. 2022 Feb 3;12:842406. doi: 10.3389/fonc.2022.842406 (PMC8850634; doi:10.3389/fonc.2022.842406)
Supplement: Supplementary file 2 [file Table_2.xlsx]

## Sheet: Differential metabolites
	Differential metabolites in OS cells after AIL treatment
Name	VIP	Fold change	P value
1-hexadecyl-2-(5z,8z,11z,14z-eicosatetraenoyl)-sn-glycero-3-phosphocholine	7.53279	2.48284	7.51e-06
Heptadecasphing-4-enine	1.78535	5.17756	2.03e-05
N-stearoyltaurine	2.29003	2.40549	3.39e-05
1-hexadecyl-2-(8z,11z,14z-eicosatrienoyl)-sn-glycero-3-phosphocholine	5.6453	2.34484	4.93e-05
Pyrophosphate	5.75675	11.2299	7.96e-05
Quercitrin	2.32665	5.32418	8.93e-05
Pg 44:12	6.1177	2.23906	9.91e-05
Pc(18:1e/9-hode)	3.97313	0.859779	0.000110995
1-(1z-octadecenyl)-2-(4z,7z,10z,13z,16z,19z-docosahexaenoyl)-sn-glycero-3-phosphocholine	4.07247	2.47368	0.000137814
Acetoveratrone	1.02365	3.38794	0.000265039
7-(2-hydroxypropan-2-yl)-1,4a-dimethyl-2,3,4,5,6,7,8,8a-octahydronaphthalen-1-ol	1.88019	5.71368	0.000336143
Phosphatidylcholine lyso alkyl 16:0	1.91134	2.44893	0.000543492
15-cyclohexylpentanorprostaglandin f2.alpha.	1.28703	2.29671	0.000571146
15s-hydroxy-8z,11z,13e-eicosatrienoic acid	1.39124	2.87274	0.000596313
Prostaglandin b1	1.06838	2.29473	0.000725668
Betaine	4.73137	0.553134	0.000735307
Nis(monooleoylglycero)phosphate (s,r isomer)	7.8032	1.46136	0.000746259
1-hexadecyl-sn-glycero-3-phosphocholine	11.2308	2.84798	0.000777814
1-(1z-octadecenyl)-2-(9z-octadecenoyl)-sn-glycero-3-phosphocholine	3.20223	2.69254	0.000856098
Nicotinate	2.9348	3.05099	0.00086741
1-hexadecyl-2-(9z-octadecenoyl)-sn-glycero-3-phosphocholine	8.17767	1.66172	0.000937076
Xanthosine	1.33794	0.350919	0.000957839
Fahfa 36:1	1.26406	2.74663	0.00107559
1-o-hexadecyl-2-o-(5z,8z,11z,14z,17z-eicosapentaenoyl)-sn-glyceryl-3-phosphorylcholine	3.77452	2.10304	0.00111992
6-formylpterin	1.25075	0.457456	0.00121553
.alpha.-L-Asp-L-Lys	1.08028	2.52065	0.00130268
Nervonic acid	2.23102	1.5832	0.00138963
Pro-hyp	3.03794	5.27747	0.0014061
5-methyl-2'-deoxycytidine	1.76707	2.44898	0.00144748
1-arachidoyl-2-hydroxy-sn-glycero-3-phosphocholine	1.08372	1.5911	0.0014533
Pg 40:7	10.1899	1.88064	0.00155466
Pg 38:6	5.21455	2.66876	0.0017105
1-(1z-hexadecenyl)-sn-glycero-3-phosphocholine	2.49075	1.70544	0.0018187
1-oleoyl-2-hydroxy-sn-glycero-3-phospho-(1'-rac-glycerol)	3.78306	3.01219	0.00193539
1-methyladenosine	5.41255	3.95415	0.00194771
(2-aminoethoxy)[2-[docosa-4.7.10.13.16.19-hexaenoyloxy]-3-[hexadec-1-en-1-yloxy]propoxy]phosphinic acid	5.53945	2.06943	0.0020757
Pi 38:5	13.3624	0.45867	0.00222615
Pg 40:8	2.31622	1.6774	0.00222803
1-(1z-octadecenyl)-sn-glycero-3-phosphocholine	5.85072	2.56319	0.00251246
N-Acetylglucosamine 1-phosphate	7.20439	3.13137	0.00257024
1-(1z-octadecenyl)-2-(5z,8z,11z,14z-eicosatetraenoyl)-sn-glycero-3-phosphocholine	3.96411	5.53334	0.00264505
(r)-butyrylcarnitine	2.8207	0.323107	0.00266399
N-arachidonoyldopamine	1.15084	5.2467	0.00280518
Thio-p-toluamide	1.369	2.02453	0.00289669
3'-hydroxyrepaglinide	1.11128	1.90578	0.00297488
1-palmitoyl-2-hydroxy-sn-glycero-3-phospho-(1'-rac-glycerol)	1.7288	2.8435	0.00326262
L-Serine	1.8767	0.553134	0.00339802
3-Phosphohydroxypyruvate	1.4583	0.327762	0.0033985
3-methylcytidine	1.31723	2.68021	0.00342602
Octadecanoic acid	5.98947	1.68942	0.00348804
1-(1z-octadecenyl)-2-(4z,7z,10z,13z,16z,19z-docosahexaenoyl)-sn-glycero-3-phosphoethanolamine	4.98308	2.14017	0.00354024
.beta.-estradiol 17-valerate	1.58639	3.7843	0.00408594
Linoleic acid	5.1511	1.91814	0.00409185
Chaulmoogric acid	2.52044	0.119252	0.00420476
1-o-hexadecyl-2-o-(4z,7z,10z,13z,16z,19z-docosahexaenoyl)-sn-glyceryl-3-phosphorylcholine	3.28824	2.80398	0.00425514
D-pyroglutamic acid	1.07628	2.65965	0.00499109
5-[1,2,4a-trimethyl-5-(propanoyloxymethyl)-2,3,4,7,8,8a-hexahydronaphthalen-1-yl]-3-methylpentanoic acid	1.1792	2.07758	0.00532781
Tetrahydroalstonine	1.19347	3.08524	0.00587981
Orotate	1.64493	0.122111	0.00600167
Gamma-l-glutamyl-l-glutamic acid	3.31318	7.60035	0.00604565
Glycerophosphocholine	13.4611	1.60393	0.00639902
hydrocortisone 21-acetate	1.93501	2.07198	0.00674671
Guanine	6.59255	0.52518	0.00676186
L-saccharopine	1.86944	11.5658	0.00731756
Prostaglandin f2.alpha.	1.25298	1.69632	0.00745868
5-aminovaleric acid betaine	1.22869	0.527332	0.00833634
1,2-benzenedicarboxylic acid	2.19108	1.33181	0.00871061
Acetylcarnitine	5.5692	0.319989	0.00879226
Thioetheramide-PC	8.576	2.39005	0.00944965
Uracil	5.70377	0.51875	0.00994501
1,2-dioleoyl-sn-glycero-3-phosphatidylcholine	14.1949	0.68151	0.0106246
(2-aminoethoxy)[3-[hexadec-1-en-1-yloxy]-2-[hexadec-9-enoyloxy]propoxy]phosphinic acid	1.45717	1.75209	0.0109964
Pi 38:4	14.8887	1.85596	0.0111066
Adenosine 5'-diphosphate (ADP)	1.3442	5.02037	0.0111239
Myristic acid	2.91332	1.63316	0.0113375
1-palmitoyl-2-oleoyl-phosphatidylglycerol	6.24799	1.45136	0.0114881
N-acetylcytidine	1.09927	0.666846	0.0115343
Taurine	2.70141	0.723154	0.0120781
Glycocholic acid	2.191	2.08563	0.0125026
Dioctyl phthalate	5.53374	2.10108	0.0135482
D-erythrose 4-phosphate	1.18855	2.16834	0.0138087
1-o-hexadecyl-2-deoxy-2-thio-s-acetyl-sn-glyceryl-3-phosphorylcholine	15.6259	1.95026	0.0142577
1-stearoyl-2-oleoyl-sn-glycero-3-phospho-(1'-sn-glycerol)	6.54243	1.56723	0.0142845
3-methyladenine	3.9314	2.10348	0.0148953
4-hydroxy-1-(2-hydroxyethyl)-2,2,6,6-tetramethylpiperidine	1.48402	3.89328	0.0149342
N-oleoyl-d-erythro-sphingosylphosphorylcholine	2.40546	1.47033	0.0160062
1-stearoyl-2-myristoyl-sn-glycero-3-phosphocholine	3.9694	2.20201	0.0162566
Pterine	1.28268	0.544612	0.016413
1-myristoyl-2-palmitoyl-sn-glycero-3-phosphocholine	1.85821	1.74684	0.0165778
Dibutyl phthalate	2.24951	1.58616	0.0165795
Cytidine monophosphate n-acetylneuraminic acid	1.05322	6.95809	0.0167531
2-dimethylamino-6-hydroxypurine	1.73669	2.58264	0.0168525
Glutamic acid	6.63298	5.17542	0.0173153
Pc(16:1e/9-hode)	2.60174	0.905213	0.017556
DL-Lysine	1.55264	1.52497	0.0192828
Sphingosine	3.24059	0.620249	0.0201143
N,n-dimethylguanosine	1.82832	2.61008	0.0202144
Naringenin-7-o-glucoside	1.23188	0.16421	0.0219625
Thymine	2.00306	0.363898	0.023369
2-docosahexaenoyl-1-stearoyl-sn-glycero-3-phosphoserine	3.64375	0.411625	0.0261819
Oleamide	2.71709	0.409953	0.0273189
Aspartic acid	1.98598	6.8702	0.030096
D-erythro-imidazolylglycerol phosphate	5.04927	0.350334	0.0307774
L-pipecolic acid	1.85974	1.62556	0.0332539
2-oleoyl-1-stearoyl-sn-glycero-3-phosphoserine	4.2556	0.480789	0.0334885
Eicosenoic acid	4.45098	1.99883	0.0344007
1-palmitoyl-2-thiopalmitoyl phosphatidylcholine	2.94139	0.527638	0.0352891
1,2-diarachidonoyl-sn-glycero-3-phosphocholine	1.64621	0.610071	0.0357472
Udp-n-acetylglucosamine	21.6762	11.6788	0.0364324
Dodecanoic acid	1.46844	1.66536	0.0365589
Siduron	4.16312	2.11686	0.0367395
Hypericin	1.04034	5.8539	0.0372942
Cytosine	2.10784	0.207548	0.0377399
N-acetyl-d-lactosamine	1.18909	2.04222	0.0386397
D-ribose 5-phosphate	1.62154	0.0605072	0.0396133
NAD+	1.41798	3.87773	0.0401423
Adenosine 5'-diphosphate	1.48135	0.14931	0.0401678
Urocanate	2.21911	0.855466	0.0410395
3-Phosphoserine	1.86479	0.480789	0.0418026
1-Stearoyl-2-oleoyl-sn-glycerol 3-phosphocholine (SOPC)	4.03785	0.71979	0.0421581
N-acetyl-d-glucosamine	4.93571	8.76454	0.0431569
N6,N6,N6-Trimethyl-L-lysine	1.75262	1.91576	0.0447991
Crotonic acid	1.48417	1.86889	0.0453298
Pyrrole-2-carboxylic acid	1.35807	2.46462	0.0455399
N-acetyl-d-glucosamine 6-phosphate	2.19339	7.85153	0.0465322
N,n'-diacetylchitobiose	3.19683	76.5453	0.0488011
Palmitic acid	5.81664	0.710885	0.0489601
1,2-dioleoyl-sn-glycero-3-phosphate	2.44812	0.692908	0.0495661
